# Supplementary material
Source: publisher figshare collection journal article supplement (https://karger.figshare.com/ndownloader/files/25520765)
Supplement: Supplementary file 1 [file 25520765]

| terms | | |
| --- | --- | --- |
| “green tea” OR “green tea extract” OR “green tea extract AR25” OR “catechin” OR “catechins” OR “EGCG” OR “Camellia sinensis” OR “tea polyphenols” OR “catechinic acid” OR “acid catechinic” OR “sinensis Camellia” OR “Thea sinensis” OR “sinensis Thea” OR “tea polyphenols” | "Type 2 diabetes" OR T2DM OR diabetes | Intervention OR "Intervention Study" OR "Intervention Studies" OR "controlled trial" OR randomized OR randomized OR random OR randomly OR placebo OR assignment OR "clinical trial" OR Trial OR assignment OR "randomized controlled trial" OR "randomized clinical trial" OR RCT OR blinded OR "double blind" OR "double blinded" OR trial OR "clinical trial" OR trials OR "Pragmatic Clinical Trial" OR "Cross-Over Studies" OR "Cross-Over" OR "Cross-Over Study" OR parallel OR "parallel study" OR "parallel trial" |

June 2019
